# Supplementary material for: Involutin Is an Fe3+ Reductant Secreted by the Ectomycorrhizal Fungus Paxillus involutus during Fenton-Based Decomposition of Organic Matter
Source: PubMed Central journal article supplement — Appl Environ Microbiol. 2015 Nov 13;81(24):8427–33. doi: 10.1128/AEM.02312-15 (PMC4644656; doi:10.1128/aem.02312-15), 2015-11-13

## Supplementary Materials

### **Involutin is a Fe<sup>3+</sup> reductant Secreted by the Ectomycorrhizal Fungus *Paxillus involutus* during Fenton-based Decomposition of Organic Matter**

Firoz Shah,<sup>a,#</sup> Daniel Schwenk,<sup>b</sup> Cesar Nicolas,<sup>a</sup> Per Persson,<sup>a,c</sup> Dirk Hoffmeister,<sup>b</sup> Anders Tunlid<sup>a</sup>

Department of Biology, Microbial Ecology Group, Lund University, Ecology Building, SE-223 62 Lund, Sweden<sup>a</sup>; Department of Pharmaceutical Biology, Hans Knöll Institute, Friedrich-Schiller-Universität, Beutenbergstrasse 11a, 07745 Jena, Germany<sup>b</sup>; Centre for Environmental and Climate Research (CEC), Lund University, Ecology Building, SE-223 62 Lund, Sweden<sup>c</sup>

## Contents

Figure S1. Standard curve for 2-hydroxyterephthalic acid.

Figure S2. Identification of secondary metabolites from the mycelium of *P. involutus* during growth on organic matter extract.

**Figure S1.** Standard curve for 2-hydroxyterephthalic acid.

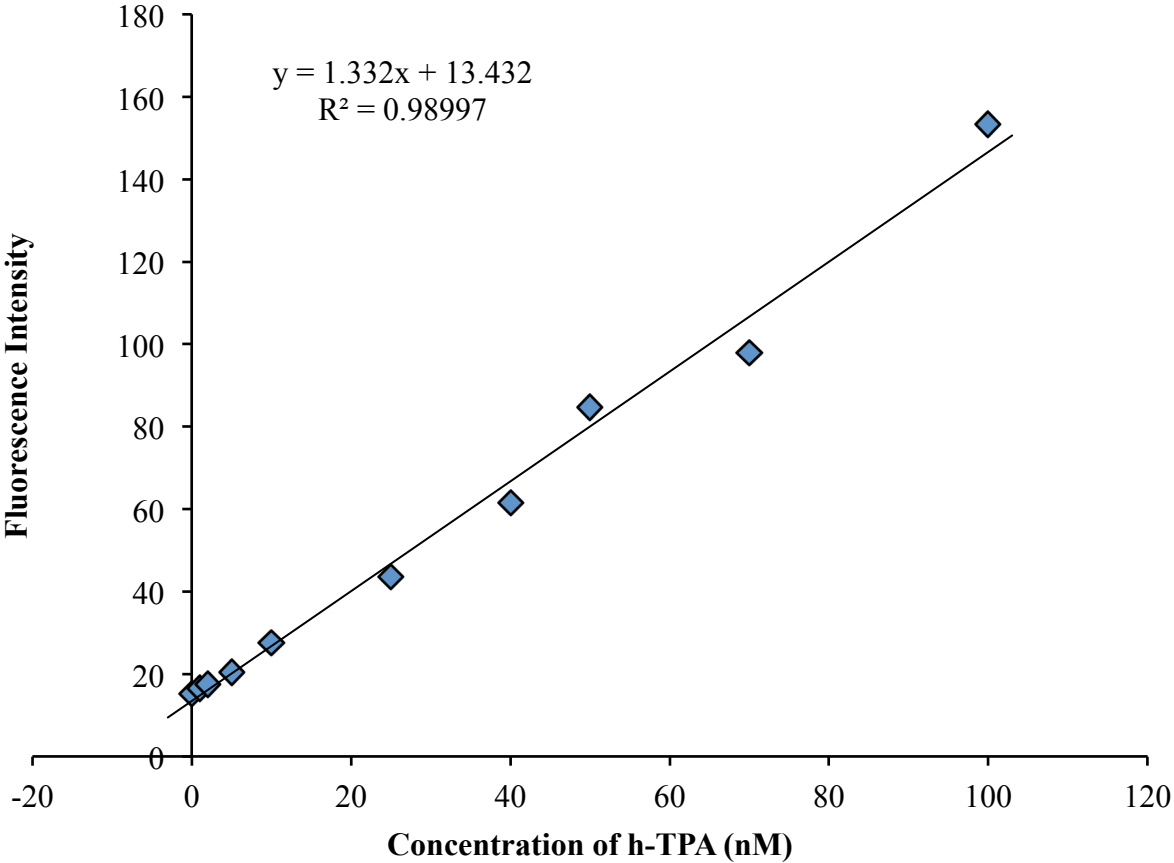

**FIG S2.** Identification of secondary metabolites from the mycelium of *P. involutus* during growth on organic matter extract. **(A)** Total ion current profile from the HRESIMS (positive mode) spectra of an EtOAc extract recovered from the mycelium. Low traces of involutin were detected, as indicated by the arrow.

Other compounds present in the EtOAc extract of the mycelia identified by HRESIMS and predicted by the Reaxys database were **(B)**  $C_7H_{11}O_5N$ ,  $m/z$  188.0553, RT: 6.26 min, and **(C)**  $C_{10}H_{16}O_3$ ,  $m/z$  183.1024, RT: 11.17 min. RT, retention time.

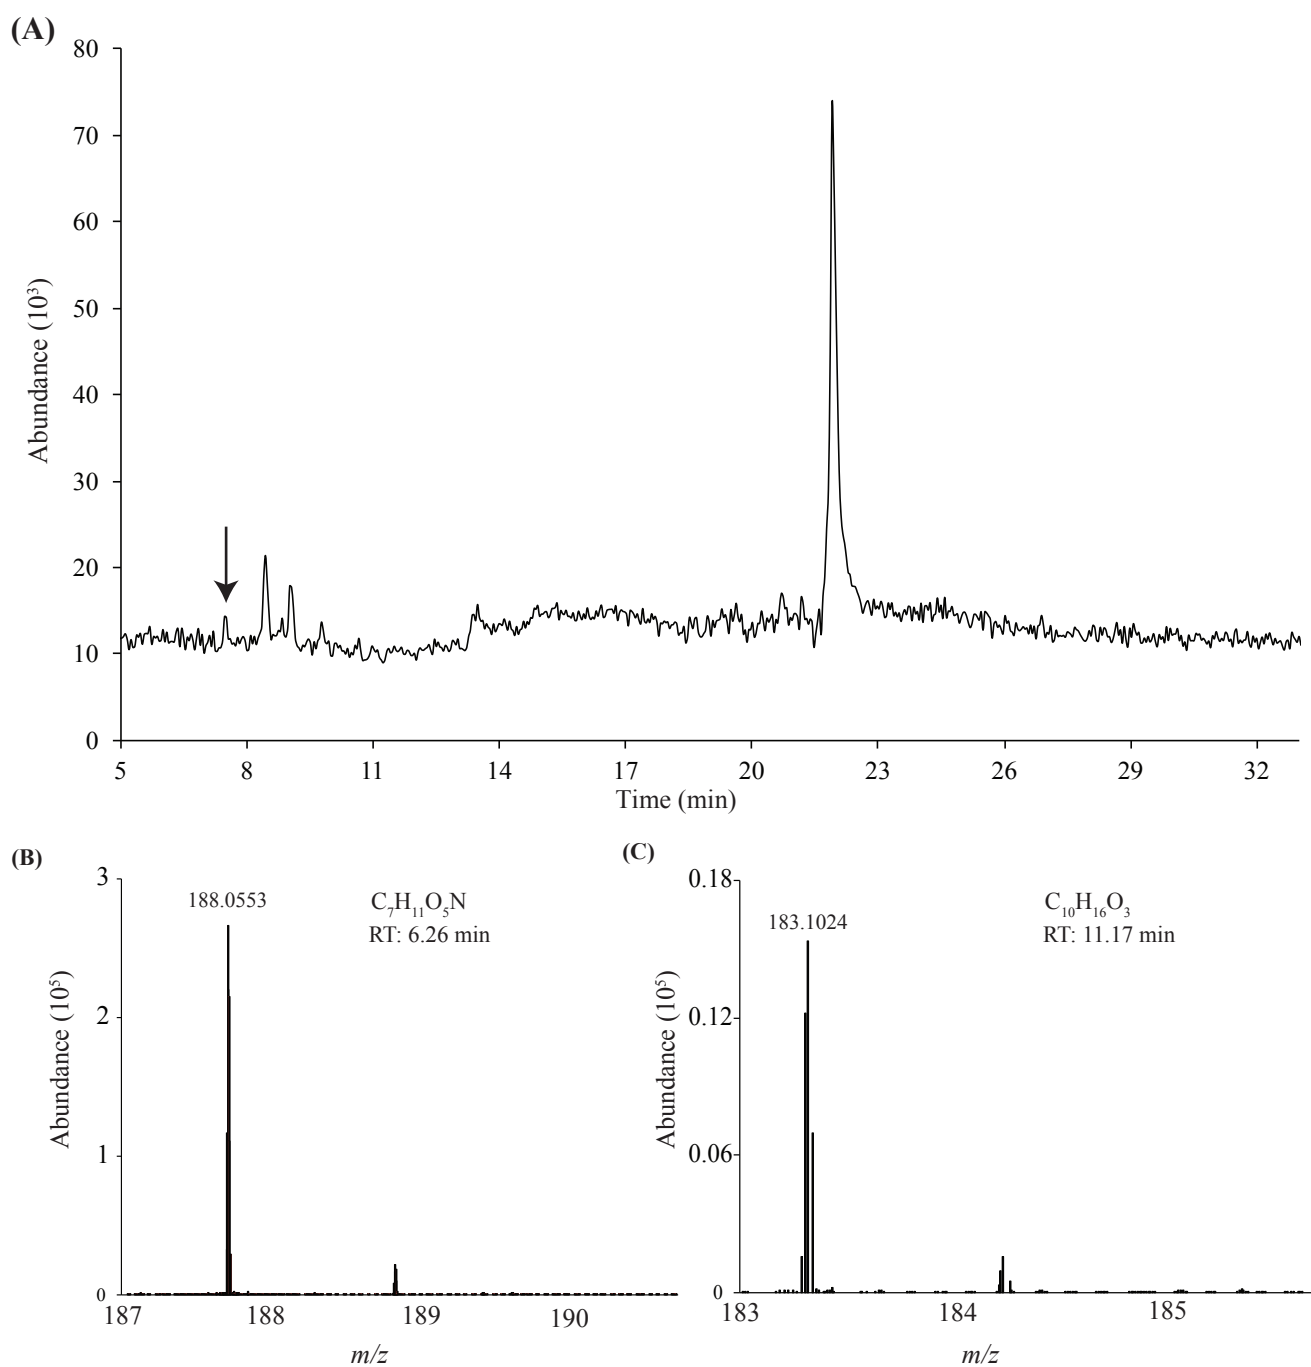

Supplement: AEM.02312-15_zam999116783so1.pdf [file AEM.02312-15_zam999116783so1.pdf]
